# Supplementary material for: The impact of weather changes on air quality and health in the United States in 1994–2012
Source: PubMed Central journal article supplement (PMC4996129; doi:10.1088/1748-9326/10/8/084009), 2015-08-12
Supplement: NIHMS805142-supplement-Supplemental_Materials.pdf [file NIHMS805142-supplement-Supplemental_Materials.pdf]

## Supplemental Information

**Figure S1.** Weather station locations. The number of stations from which temperature (temp), wind speed (ws), and water vapor pressure (wvp) data were obtained is denoted by  $n_{temp,ws,wvp}$ . The number of stations from which precipitation frequency data were obtained is denoted by  $n_{rain}$ . (NW: Northwest, UM: Upper Midwest, IM: Industrial Midwest, NE: Northeast, SC: Southern California, SW: Southwest, SE: Southeast).

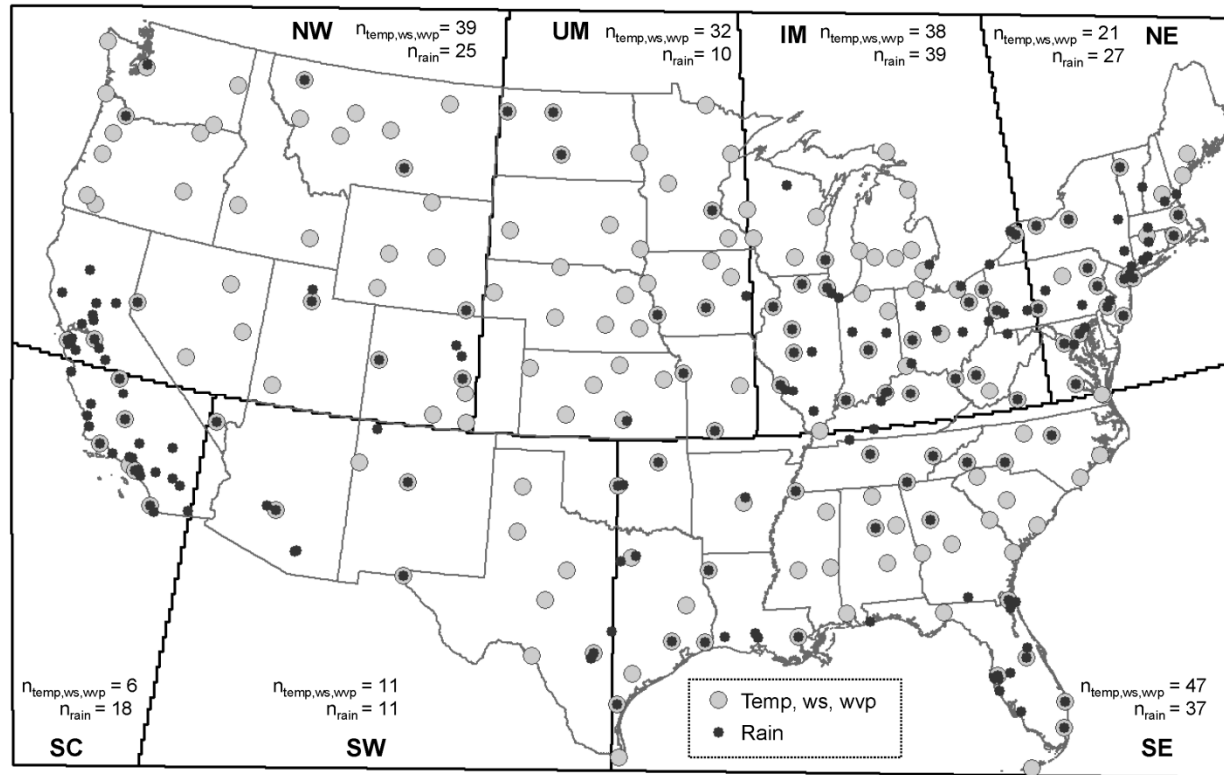

**Figure S2.** Illustration of weather penalty calculation method for O<sub>3</sub>.

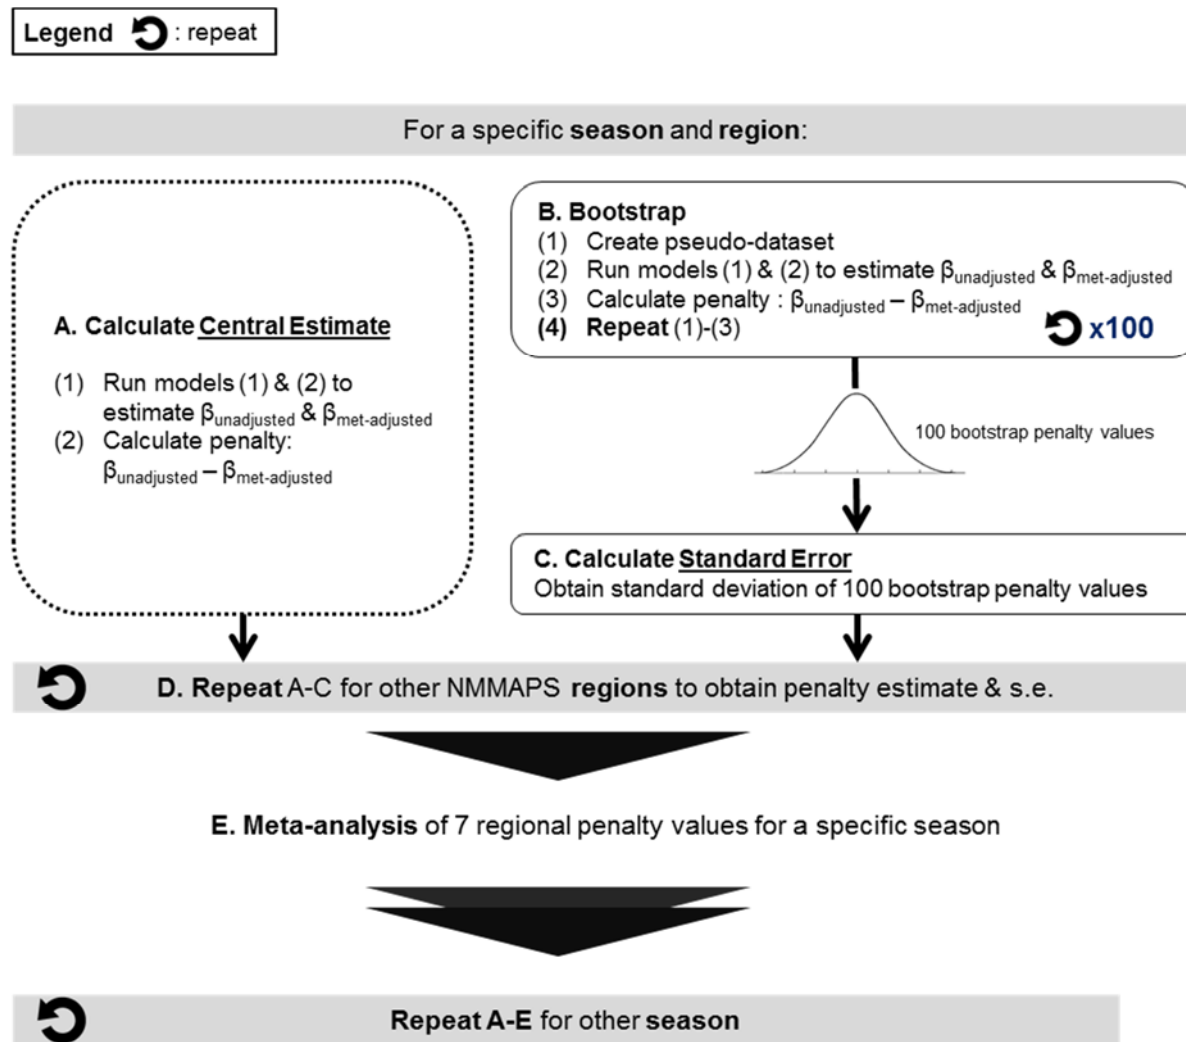

**Figure S3.** Changes in O<sub>3</sub> and PM<sub>2.5</sub> by month between 1994-2012.

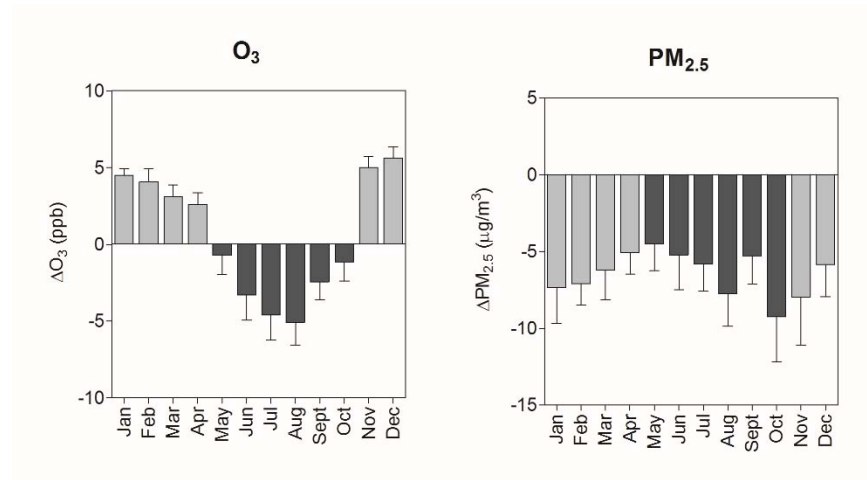

**Figure S4.** Unadjusted trends, weather-adjusted trends (using relative humidity instead of water vapor pressure), and weather penalties of 8-h max O<sub>3</sub> and PM<sub>2.5</sub> in 1994-2012 by region and season. The 95% confidence intervals are shown.

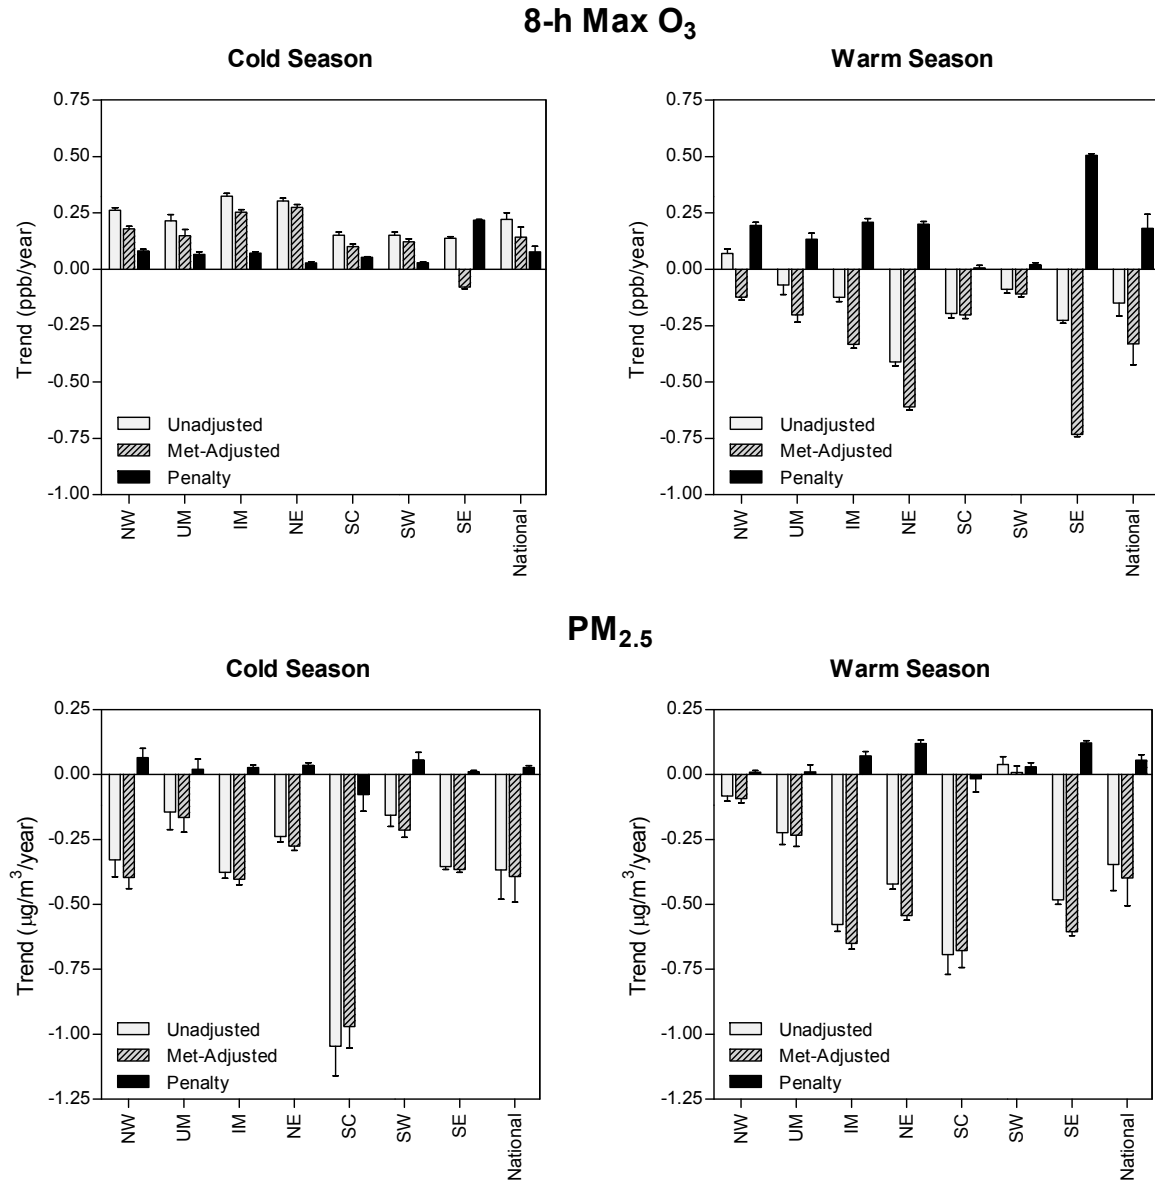

**Figure S5.** Unadjusted trends, weather-adjusted trends, and penalties of 1-h max O<sub>3</sub> (Apr-Sept) and PM<sub>2.5</sub> (Jan-Dec) that were applied to estimate mortality averted. The 95% confidence intervals are shown.

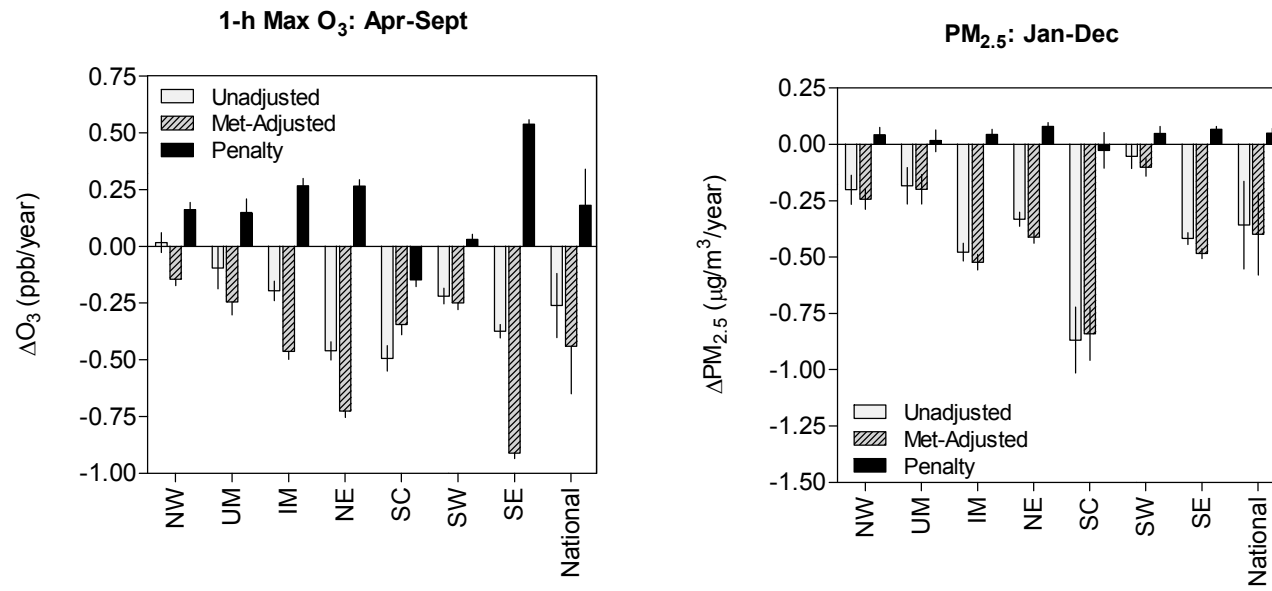

**Table S1.** Distance between Air Quality Monitoring Stations and nearest Weather Stations (in km)

| <b>Ozone</b>        |            |             |               |                     |
|---------------------|------------|-------------|---------------|---------------------|
| <b>Region</b>       | <b>N</b>   | <b>Mean</b> | <b>Median</b> | <b>(Min, Max)</b>   |
| Industrial Midwest  | 30         | 57.5        | 38.1          | (8.8, 183.9)        |
| Northeast           | 45         | 70.0        | 48.8          | (5.1, 194.0)        |
| Northwest           | 73         | 117.2       | 109.5         | (2.2, 294.0)        |
| Southeast           | 144        | 62.8        | 43.0          | (6.1, 202.5)        |
| Southern California | 95         | 81.5        | 64.8          | (2.9, 225.2)        |
| Southwest           | 68         | 71.3        | 27.8          | (5.7, 331.1)        |
| Upper Midwest       | 13         | 85.8        | 68.0          | (5.1, 212.3)        |
| <b>All</b>          | <b>468</b> | <b>77.3</b> | <b>53.3</b>   | <b>(2.2, 331.1)</b> |

  

| <b>Region</b>       | <b>N</b>  | <b>PM<sub>2.5</sub> (ws, temp, wvp)</b> |               |                     | <b>PM<sub>2.5</sub> (prcp frequency)</b> |               |                     |
|---------------------|-----------|-----------------------------------------|---------------|---------------------|------------------------------------------|---------------|---------------------|
|                     |           | <b>Mean</b>                             | <b>Median</b> | <b>(Min, Max)</b>   | <b>Mean</b>                              | <b>Median</b> | <b>(Min, Max)</b>   |
| Industrial Midwest  | 11        | 16.5                                    | 16.3          | (3.7, 34.3)         | 14.5                                     | 15.5          | (3.7, 25.9)         |
| Northeast           | 14        | 47.5                                    | 37.1          | (9.4, 111.7)        | 36.8                                     | 12.5          | (4.9, 120.8)        |
| Northwest           | 5         | 58.5                                    | 53.4          | (9.3, 108.5)        | 30.3                                     | 21.6          | (5.7, 61.6)         |
| Southeast           | 24        | 25.5                                    | 17.6          | (5.0, 108.3)        | 58.1                                     | 20.3          | (6.1, 286.8)        |
| Southern California | 4         | 25.0                                    | 12.7          | (4.2, 70.2)         | 11.6                                     | 11.7          | (4.2, 18.9)         |
| Southwest           | 3         | 8.9                                     | 10.7          | (4.1, 12.0)         | 8.9                                      | 10.7          | (4.1, 12.0)         |
| Upper Midwest       | 1         | 9.3                                     | 9.3           | (9.3, 9.3)          | 9.3                                      | 9.3           | (9.3, 9.3)          |
| <b>All</b>          | <b>62</b> | <b>30.4</b>                             | <b>17.4</b>   | <b>(3.7, 111.7)</b> | <b>37.2</b>                              | <b>15.8</b>   | <b>(3.7, 286.8)</b> |

**Table S2.** Trends of weather parameters in cold and warm seasons in 1994-2003 and 2004-2012. (*italics*: p-value > 0.05)

|                 | (per year) | Cold        |             | Warm        |           |
|-----------------|------------|-------------|-------------|-------------|-----------|
|                 |            | 1994-2003   | 2004-2012   | 1994-2003   | 2004-2012 |
| <b>National</b> | temp (°C)  | 0.06        | 0.06        | 0.03        | 0.08      |
|                 | ws (m/s)   | -0.03       | -0.02       | -0.02       | -0.03     |
|                 | wvp (hPa)  | 0.02        | 0.01        | <i>0.00</i> | -0.05     |
|                 | prcp (%)   | 1.29        | -0.35       | 2.61        | 0.44      |
| <b>IM</b>       | temp (°C)  | 0.15        | 0.13        | <i>0.00</i> | 0.10      |
|                 | ws (m/s)   | -0.02       | -0.05       | -0.02       | -0.02     |
|                 | wvp (hPa)  | 0.06        | 0.03        | 0.02        | -0.02     |
|                 | prcp (%)   | 1.08        | -1.38       | 3.23        | 0.18      |
| <b>NE</b>       | temp (°C)  | 0.07        | 0.20        | -0.02       | 0.11      |
|                 | ws (m/s)   | -0.04       | -0.04       | -0.04       | -0.03     |
|                 | wvp (hPa)  | 0.04        | 0.04        | 0.03        | 0.03      |
|                 | prcp (%)   | 1.46        | 0.03        | 3.21        | 1.47      |
| <b>NW</b>       | temp (°C)  | -0.02       | -0.04       | 0.08        | 0.02      |
|                 | ws (m/s)   | -0.02       | <i>0.00</i> | -0.01       | -0.03     |
|                 | wvp (hPa)  | -0.01       | -0.04       | -0.04       | -0.06     |
|                 | prcp (%)   | 3.91        | 0.72        | 1.88        | -0.45     |
| <b>SE</b>       | temp (°C)  | <i>0.00</i> | 0.06        | 0.02        | 0.07      |
|                 | ws (m/s)   | -0.04       | -0.03       | -0.02       | -0.02     |
|                 | wvp (hPa)  | <i>0.01</i> | 0.05        | 0.03        | -0.05     |
|                 | prcp (%)   | 0.19        | -0.31       | 2.23        | 0.53      |
| <b>SC</b>       | temp (°C)  | -0.09       | -0.02       | -0.06       | -0.02     |
|                 | ws (m/s)   | -0.05       | -0.03       | -0.04       | -0.03     |
|                 | wvp (hPa)  | -0.08       | -0.09       | <i>0.00</i> | -0.03     |
|                 | prcp (%)   | 2.49        | -0.83       | -1.08       | -2.93     |
| <b>SW</b>       | temp (°C)  | <i>0.00</i> | 0.08        | 0.05        | 0.19      |
|                 | ws (m/s)   | <i>0.01</i> | <i>0.01</i> | 0.02        | 0.01      |
|                 | wvp (hPa)  | 0.03        | -0.09       | 0.02        | -0.21     |
|                 | prcp (%)   | 0.38        | -0.83       | 2.42        | 0.98      |
| <b>UM</b>       | temp (°C)  | 0.19        | <i>0.01</i> | 0.04        | 0.09      |
|                 | ws (m/s)   | -0.02       | -0.03       | -0.01       | -0.04     |
|                 | wvp (hPa)  | 0.05        | <i>0.01</i> | -0.03       | -0.05     |
|                 | prcp (%)   | 0.30        | -0.44       | 1.64        | -1.04     |

**Table S3.** Comparison of national weather-adjusted trends and weather penalties of O<sub>3</sub> and PM<sub>2.5</sub> using water vapor pressure versus relative humidity.

|                              | <i>Adjusted trends</i> |             | <i>Penalty</i> |             |
|------------------------------|------------------------|-------------|----------------|-------------|
|                              | <i>wvp</i>             | <i>rhum</i> | <i>wvp</i>     | <i>rhum</i> |
| <i>O<sub>3</sub> cold</i>    | 0.149                  | 0.142       | 0.071          | 0.078       |
| <i>O<sub>3</sub> warm</i>    | -0.334                 | -0.331      | 0.185          | 0.181       |
| <i>PM<sub>2.5</sub> cold</i> | -0.392                 | -0.392      | 0.027          | 0.027       |
| <i>PM<sub>2.5</sub> warm</i> | -0.397                 | -0.397      | 0.056          | 0.056       |
